# Supplementary material for: Economic evaluation: immunoglobulin vs prophylactic antibiotics in hypogammaglobulinemia and hematological malignancies
Source: PubMed Central journal article supplement — Blood Adv. 2024 Mar 17;8(9):2259–67. doi: 10.1182/bloodadvances.2023012047 (PMC11116992; doi:10.1182/bloodadvances.2023012047), 2024-03-17
Supplement: BLOODA_ADV-2023-012047-mmc1.pdf [file BLOODA_ADV-2023-012047-mmc1.pdf]

## Supplementary materials

**Title:** Immunoglobulin replacement versus prophylactic antibiotics for infection prevention in patients with acquired hypogammaglobulinemia secondary to haematological malignancies: an economic evaluation of the RATIONAL feasibility trial

**Authors:** Sara Carrillo de Albornoz, Alisa M. Higgins, Dennis Petrie, Adam Irving, Laura Fanning, Robert Weinkove, Philip Crispin, Claire Dendle, Michael Gilbertson, Anna Johnston, Anastazia Keegan, Dominic Pepperell, Humphrey Pullon, John Reynolds, Tina van Tonder, Judith Trotman, Neil Waters, Cameron Wellard, Helen Weston, C. Orla Morrissey, Erica M. Wood, and Zoe K. McQuilten.

**Table S1. Resource use items and costs**

| Description                           | Cost per item (AU\$ 2023) | Source                                      |
|---------------------------------------|---------------------------|---------------------------------------------|
| <b>Resource use costs</b>             |                           |                                             |
| Hospitalisation per day               | \$2,706.61                | NHCDC 24 (2019-2020) <sup>a</sup>           |
| Emergency department admission        | \$929.84                  | NHCDC 24 (2019-2020) <sup>b</sup>           |
| Intensive care Unit (per day)         | \$5,850.0                 | ANZIC (2019-2020) <sup>c</sup>              |
| Specialist consultation               | \$161.90                  | MBS item 110                                |
| General practitioner                  | \$58.35                   | MBS items 23, 36                            |
| Day procedure                         | \$1,896                   | NHCDC 24 (2019-2020) <sup>d</sup>           |
| Lymph biopsy                          | \$51.25                   | MBS item 30078                              |
| Xray                                  | \$43.15                   | MBS items 58500, 58503, 58900, 58903        |
| Culture                               | \$31.99                   | MBS items 69354, 69333, 69345, 69303        |
| PCR                                   | \$42.50                   | MBS items 69479                             |
| <b>Prophylactic treatment</b>         |                           |                                             |
| Ig (cost/gram)                        | \$72.49                   | MSAC 1695 (2019) <sup>e</sup>               |
| IVIg administration                   | \$1,081.35                | Alfred Health (2023) <sup>f</sup>           |
| SCIg administration                   | \$200                     | Blood Matters Programme (2023) <sup>g</sup> |
| Trimethoprim +sulfamethoxazole (DPMQ) | \$14.83                   | PBS item 2951H                              |
| Doxycycline 100g, 50g (DPMQ)          | \$22.90, \$15.22          | PBS item 10779H, 2711Q                      |

Abbreviations: DPMQ: dispensed price for maximum quantity; Ig: immunoglobulin; IVIg: intravenous immunoglobulin; MSAC: Medical Services Advisory Committee; NHCDC: National Hospital Cost Data Collection; PBS: Pharmaceutical Benefits Scheme; SClg: subcutaneous immunoglobulin;

\*An inflation index was applied to all costs prior 2023, based on the Australian Consumer Price Index- Medical and hospital services March 2023

<sup>a</sup> Total cost per patient per hospital admission per day

<sup>b</sup> Total cost per patient per emergency admission<sup>c</sup> ANZICS Centre for Outcome and Resource Evaluation 2019 Report: Accessed on 13/09/23: <https://www.anzics.com.au/wp-content/uploads/2020/11/2019-CORE-Report.pdf>

<sup>d</sup> Average cost of same day procedures, using the most applicable codes in the NHCDC 24 (B40Z and M40Z)

<sup>e</sup> Wyndham, A, Vogan, A, Newton, S, Schubert, C. (2019). Immunoglobulin for acquired hypogammaglobulinaemia secondary to haematological malignancies, or post-haemopoietic stem cell transplantation (HSCT). MSAC Application 1565, Assessment Report. Commonwealth of Australia, Canberra, ACT

<sup>f</sup> Private communication. Calculated as a day admission at the current Victorian Efficient Price.

<sup>g</sup> Consultation Paper on the Pricing Framework for Australian Public Hospital Services 2023-24. NBA Blood Matters programme.

Accessed on 13/09/2023: [https://www.ihacpa.gov.au/sites/default/files/2022-09/blood\\_matters\\_program\\_national\\_bloody\\_authority.pdf](https://www.ihacpa.gov.au/sites/default/files/2022-09/blood_matters_program_national_bloody_authority.pdf)

**Table S2. Sensitivity analyses - Cost-effectiveness results**

| Trial-based 1-year results                                | Prophylactic Ig<br>Mean (95%CI)            | Prophylactic antibiotics<br>Mean (95%CI) | Difference<br>Mean (95% CI) |
|-----------------------------------------------------------|--------------------------------------------|------------------------------------------|-----------------------------|
| <b>Results adjusted by EQ-5D-derived baseline utility</b> |                                            |                                          |                             |
| Total costs per person                                    | \$46,372 (35,652, 57,093)                  | \$17,728 (9,920, 25,537)                 | \$28,644 (15,454, 41,833)   |
| QALY per person                                           | 0.817 (0.776, 0.858)                       | 0.851 (0.822, 0.880)                     | -0.041 (-0.101, 0.019)      |
| Serious infections per person                             | 0.25 (-0.15, 0.64)                         | 0.52 (0.23, 0.81)                        | -0.27 (-0.78, 0.22)         |
| All infections per person                                 | 2.73 (1.83, 3.63)                          | 2.12 (1.46, 2.77)                        | 0.61 (-0.51, 1.73)          |
| ICER (cost/QALY)                                          | Ig dominated (more costs, fewer QALYs)     |                                          |                             |
| ICER (cost/serious infection)                             | \$104,744 per serious infection prevented  |                                          |                             |
| ICER (cost/any infection)                                 | Ig dominated (more costs, more infections) |                                          |                             |
| Net monetary benefit                                      | -32,976 (-45,678, -19,958)                 |                                          |                             |
| <b>Results using EORCT-QLQ-C30-derived utilities</b>      |                                            |                                          |                             |
| Total costs per person                                    | \$46,953 (38,474, 55,431)                  | \$17,813 (9,345, 26,280)                 | \$29,140 (15,941, 42,340)   |
| QALY per person                                           | 0.614 (0.490, 0.738)                       | 0.716 (0.657, 0.775)                     | -0.102 (-0.219, 0.158)      |
| ICER (cost/QALY)                                          | Ig dominated (more costs, less QALYs)      |                                          |                             |
| <b>Results assuming 16% of Ig patients receive SCIg</b>   |                                            |                                          |                             |
| Total costs per person                                    | \$46,621 (38,471, 54,771)                  | \$17,813 (9,345, 26,280)                 | \$28,809 (15,703, 41,915)   |
| QALY per person                                           | 0.614 (0.490, 0.738)                       | 0.716 (0.657, 0.775)                     | -0.102 (-0.219, 0.158)      |
| ICER (cost/QALY)                                          | Ig dominated (more costs, less QALYs)      |                                          |                             |
| <b>Results assuming 50% of Ig patients receive SCIg</b>   |                                            |                                          |                             |
| Total costs per person                                    | \$44,866 (36,648, 53,084)                  | \$17,813 (9,345, 26,280)                 | \$27,053 (13,929, 40,178)   |
| QALY per person                                           | 0.614 (0.490, 0.738)                       | 0.716 (0.657, 0.775)                     | -0.102 (-0.219, 0.158)      |
| ICER (cost/QALY)                                          | Ig dominated (more costs, less QALYs)      |                                          |                             |

Abbreviations: CI: confidence interval; Ig: immunoglobulin; ICER: incremental cost-effectiveness ratio; QALY: quality-adjusted life year  
All costs are in \$AU 2023

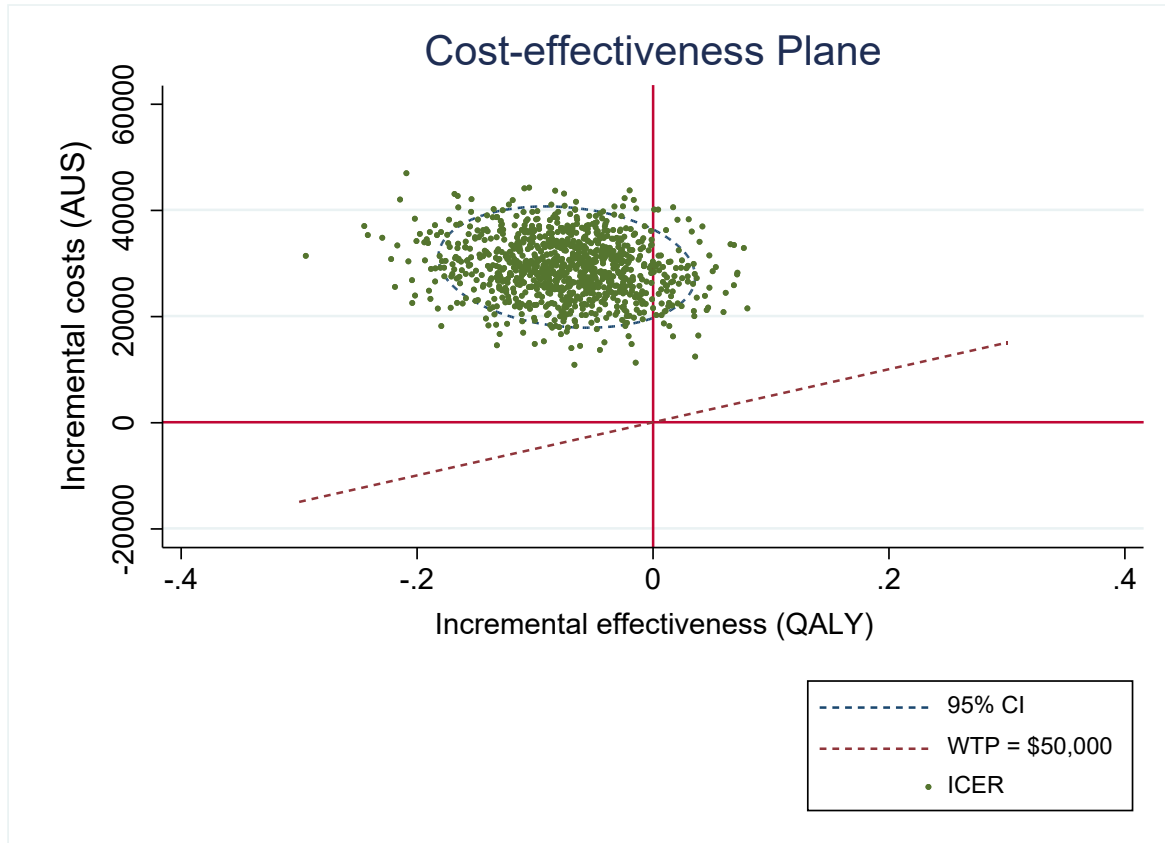

**Figure S1. Cost-effectiveness plane (adjusted by baseline utility): Ig vs. antibiotics**

Probabilistic sensitivity analysis. The ellipse represents the 95% CI around the ICER points, calculated via bootstrap (1000 iterations). The ICER scatter lies over the willingness to pay line of AU\$50,000 per QALY, indicating prophylactic Ig is less effective and more costly than antibiotics in this population and at that WTP threshold.

Abbreviations: CI: confidence interval, ICER: incremental cost-effectiveness ratio, QALY: quality-adjusted life year, WTP: willingness to pay
